# Supplementary material for: New ligand platforms for developing the chemistry of the TiN–NR2 functional group and the insertion of alkynes into the N–N bond of a TiN–NPh2 ligand
Source: Royal Society of Chemistry journal article supplement (doi:10.1039/b711941k), 2007-01-01
Supplement: b711941k.pdf [file b711941k.pdf]

New ligand platforms for developing the chemistry of the Ti=N-NR<sub>2</sub>  
functional group and insertion of alkynes into the N-N bond of a  
Ti=N-NPh<sub>2</sub> ligand

---

Supporting information

---

**Data for Ti{MeN(CH<sub>2</sub>CH<sub>2</sub>NSiMe<sub>3</sub>)<sub>2</sub>}(NNPh<sub>2</sub>)(py) (2).** <sup>1</sup>H NMR (C<sub>6</sub>D<sub>6</sub>, 299.9 MHz, 293 K): δ 8.68 (2 H, d, <sup>3</sup>J = 6.4 Hz, *o*-NC<sub>5</sub>H<sub>5</sub>), 7.87 (4 H, d, <sup>3</sup>J = 7.6 Hz, *o*-C<sub>6</sub>H<sub>5</sub>), 7.31 (4 H, app. t, <sup>3</sup>J = 7.1 Hz and 7.6 Hz, *m*-C<sub>6</sub>H<sub>5</sub>), 6.91 (2 H, t, <sup>3</sup>J = 7.1 Hz, *p*-C<sub>6</sub>H<sub>5</sub>), 6.68 (1 H, t, <sup>3</sup>J = 7.6 Hz, *p*-NC<sub>5</sub>H<sub>5</sub>), 6.38 (2 H, app. t, <sup>3</sup>J = 6.4 Hz and 7.6 Hz, *m*-NC<sub>5</sub>H<sub>5</sub>), 3.56, 3.39 (2 × 2 H, 2 × m, CH<sub>2</sub>NSiMe<sub>3</sub>), 2.74, 2.56 (2 × 2 H, 2 × m, CH<sub>2</sub>NMe), 2.62 (3 H, s, NMe), 0.03 (18 H, s, SiMe<sub>3</sub>). <sup>13</sup>C-<sup>1</sup>H NMR (C<sub>6</sub>D<sub>6</sub>, 75.4 MHz, 293 K): δ 153.9 (*o*-NC<sub>5</sub>H<sub>5</sub>), 147.9 (*i*-C<sub>6</sub>H<sub>5</sub>), 138.7 (*p*-NC<sub>5</sub>H<sub>5</sub>), 129.3 (*m*-C<sub>6</sub>H<sub>5</sub>), 124.0 (*m*-NC<sub>5</sub>H<sub>5</sub>), 122.2 (*p*-C<sub>6</sub>H<sub>5</sub>), 119.1 (*o*-C<sub>6</sub>H<sub>5</sub>), 63.6 (CH<sub>2</sub>NMe), 50.7 (NMe), 48.2 (CH<sub>2</sub>NSiMe<sub>3</sub>), 1.9 (SiMe<sub>3</sub>). IR (NaCl plates, Nujol mull, cm<sup>-1</sup>): ν 1600 (m), 1586 (s), 1486 (s), 1445 (s), 1308 (w), 1298 (w), 1240 (s), 1211 (w), 1168 (w), 1078 (m), 1064 (m), 1041 (m), 1012 (w), 989 (w), 919 (s), 841 (s), 799 (m), 745 (s), 697 (s), 636 (w), 621 (w). EI-MS: *m/z* 489 [M-py]<sup>+</sup> (16%), 168 [NPh<sub>2</sub>]<sup>+</sup> (73%). Anal. Found (calcd. for C<sub>28</sub>H<sub>44</sub>N<sub>6</sub>Si<sub>2</sub>Ti): C, 59.0 (59.1); H, 7.7 (7.8); N, 14.7 (14.8) %.

**Data for Ti{(2-C<sub>5</sub>H<sub>4</sub>N)CH<sub>2</sub>N(CH<sub>2</sub>CH<sub>2</sub>NSiMe<sub>3</sub>)<sub>2</sub>}(NNPh<sub>2</sub>) (3).** <sup>1</sup>H NMR (C<sub>6</sub>D<sub>6</sub>, 299.9 MHz, 293 K): δ 8.98 (1 H, d, <sup>3</sup>J = 6.5 Hz, 6-NC<sub>5</sub>H<sub>4</sub>), 7.75 (4 H, d, <sup>3</sup>J = 8.3 Hz, *o*-C<sub>6</sub>H<sub>5</sub>), 7.24 (4 H, app. t, <sup>3</sup>J = 8.3 Hz and 7.6 Hz, *m*-C<sub>6</sub>H<sub>5</sub>), 6.87 (2 H, t, <sup>3</sup>J = 7.6 Hz, *p*-C<sub>6</sub>H<sub>5</sub>), 6.61 (1 H, app. t, <sup>3</sup>J = 7.6 Hz and 7.7 Hz, 4-NC<sub>5</sub>H<sub>4</sub>), 6.12 (1 H, app. t, <sup>3</sup>J = 7.7 Hz, 5-NC<sub>5</sub>H<sub>4</sub>), 6.06 (1 H, d, <sup>3</sup>J = 7.6 Hz, 3-NC<sub>5</sub>H<sub>4</sub>), 3.66 (2 H, m, CH<sub>2</sub>NSiMe<sub>3</sub> inner protons), 3.46 (2 H, m, CH<sub>2</sub>NSiMe<sub>3</sub> outer protons), 3.01 (2 H, s, CH<sub>2</sub>NC<sub>5</sub>H<sub>4</sub>), 2.60 (2 H, m, CH<sub>2</sub>N inner protons), 2.08 (2 H, m, CH<sub>2</sub>N outer protons), 0.45 (18 H, s, SiMe<sub>3</sub>). <sup>13</sup>C-<sup>1</sup>H NMR (C<sub>6</sub>D<sub>6</sub>, 75.4 MHz, 293 K): δ 159.3 (2-NC<sub>5</sub>H<sub>5</sub>), 154.5 (6-NC<sub>5</sub>H<sub>5</sub>), 147.8 (*i*-C<sub>6</sub>H<sub>5</sub>), 140.0 (4-NC<sub>5</sub>H<sub>5</sub>), 129.5 (*m*-C<sub>6</sub>H<sub>5</sub>), 127.8, 123.5 (3-NC<sub>5</sub>H<sub>5</sub> and 5-NC<sub>5</sub>H<sub>5</sub>), 122.0 (*p*-C<sub>6</sub>H<sub>5</sub>), 120.5 (*o*-C<sub>6</sub>H<sub>5</sub>), 57.3 (CH<sub>2</sub>NC<sub>5</sub>H<sub>5</sub>), 56.4 (NCH<sub>2</sub>), 49.2 (CH<sub>2</sub>NSiMe<sub>3</sub>), 3.2 (SiMe<sub>3</sub>). IR (NaCl plates, Nujol mull, cm<sup>-1</sup>): ν 1593 (m), 1583 (m), 1487 (s), 1312 (w), 1237 (m), 1168 (w), 1156 (w), 1086 (s), 1024 (m), 946 (m), 934 (m), 866 (m), 833 (s), 793 (m), 756 (w), 740 (m), 701 (w), 692 (w), 630 (w), 584 (w). EI-MS: *m/z* 168 [NPh<sub>2</sub>]<sup>+</sup> (88%), 73 [SiMe<sub>3</sub>] (88 %). Anal. Found (calcd. for C<sub>28</sub>H<sub>42</sub>N<sub>6</sub>Si<sub>2</sub>Ti): C, 59.2 (59.3); H, 7.4 (7.5); N, 14.7 (14.8) %

**Data for Ti(NNPh<sub>2</sub>)(BnCalix) (4).** <sup>1</sup>H NMR (C<sub>6</sub>D<sub>6</sub>, 299.9 MHz, 293 K): δ 8.23 (4 H, d, <sup>3</sup>J = 8.8 Hz, *o*-NC<sub>6</sub>H<sub>5</sub>), 7.26 (4 H, app. t, <sup>3</sup>J = 7.0 Hz and 8.8 Hz, *m*-NC<sub>6</sub>H<sub>5</sub>), 7.17 (4 H, s, OC<sub>6</sub>H<sub>2</sub><sup>1</sup>Bu), 7.02 (10 H, m, CC<sub>6</sub>H<sub>5</sub>), 6.92 (2 H, t, <sup>3</sup>J = 7.0 Hz, *p*-NC<sub>6</sub>H<sub>5</sub>), 6.79 (4 H, s, BnOC<sub>6</sub>H<sub>2</sub><sup>1</sup>Bu), 5.63 (4 H, s, CH<sub>2</sub>C<sub>6</sub>H<sub>5</sub>), 4.48 (4 H, d, <sup>2</sup>J = 12.4 Hz, ArCH<sub>2</sub>Ar proximal to Bn), 3.05 (4 H, d, <sup>2</sup>J = 12.4 Hz, ArCH<sub>2</sub>Ar distal to Bn), 1.43 (18 H, s, OC<sub>6</sub>H<sub>2</sub><sup>1</sup>Bu), 0.68 (18 H, s, BnOC<sub>6</sub>H<sub>2</sub><sup>1</sup>Bu). <sup>13</sup>C-<sup>1</sup>H NMR (C<sub>6</sub>D<sub>6</sub>, 75.4 MHz, 293 K): δ 160.5 (*i*-OC<sub>6</sub>H<sub>2</sub><sup>1</sup>Bu), 149.3 (*p*-BnOC<sub>6</sub>H<sub>2</sub><sup>1</sup>Bu), 148.8 (*i*-BnOC<sub>6</sub>H<sub>5</sub><sup>1</sup>Bu), 146.9 (*p*-NC<sub>6</sub>H<sub>5</sub>), 140.8 (*p*-BnOC<sub>6</sub>H<sub>2</sub><sup>1</sup>Bu), 134.8 (*i*-CH<sub>2</sub>C<sub>6</sub>H<sub>5</sub>), 133.9 (*o*-OC<sub>6</sub>H<sub>2</sub><sup>1</sup>Bu), 131.9 (overlapping 2 × CH<sub>2</sub>C<sub>6</sub>H<sub>5</sub>), 129.9 (*o*-BnOC<sub>6</sub>H<sub>2</sub><sup>1</sup>Bu), 128.9 (CH<sub>2</sub>C<sub>6</sub>H<sub>5</sub>), 127.1 (*m*-BnOC<sub>6</sub>H<sub>2</sub><sup>1</sup>Bu), 124.9 (*m*-OC<sub>6</sub>H<sub>2</sub><sup>1</sup>Bu), 123.1 (*m*-NC<sub>6</sub>H<sub>5</sub>), 118.2 (*o*-NC<sub>6</sub>H<sub>5</sub>), 89.1 (CH<sub>2</sub>C<sub>6</sub>H<sub>5</sub>), 34.6 (ArCH<sub>2</sub>Ar), 34.5 (OC<sub>6</sub>H<sub>2</sub>CMe<sub>3</sub>), 34.1 (BnOC<sub>6</sub>H<sub>2</sub>CMe<sub>3</sub>), 32.6 (OC<sub>6</sub>H<sub>2</sub>CMe<sub>3</sub>), 31.0 (BnOC<sub>6</sub>H<sub>2</sub>CMe<sub>3</sub>). IR (NaCl plates, Nujol mull, cm<sup>-1</sup>): ν 1587 (m), 1479 (s, broad), 1393 (w), 1361 (m), 1325 (s), 1314 (s), 1273 (s), 1212 (s), 1186 (m), 1168 (m), 1121 (m), 1027 (w), 934 (m), 917 (m), 872 (m), 857 (m), 795 (s), 754 (m), 745 (m), 699 (m), 693 (m), 677 (m), 627 (m), 612 (w), 573 (w). EI-MS: *m/z* 1056 [M<sup>+</sup>] (26 %). Anal. Found (calcd. for C<sub>70</sub>H<sub>76</sub>N<sub>2</sub>O<sub>4</sub>Ti): C, 75.6 (79.5); H, 7.3 (7.3); N, 2.5 (2.7) %.

**Data for Ti{MeN(CH<sub>2</sub>CH<sub>2</sub>NSiMe<sub>3</sub>)<sub>2</sub>}{NC(Me)C(Me)NPh<sub>2</sub>}(py) (6).** <sup>1</sup>H NMR (C<sub>6</sub>D<sub>6</sub>, 299.9 MHz, 293 K): δ 8.31 (2 H, d, <sup>3</sup>J = 5.2 Hz, *o*-NC<sub>5</sub>H<sub>5</sub>), 7.60 (4 H, d, <sup>3</sup>J = 8.2 Hz, *o*-C<sub>6</sub>H<sub>5</sub>), 7.27 (4 H, app. t, <sup>3</sup>J = 8.2 Hz, *m*-C<sub>6</sub>H<sub>5</sub>), 6.89 (2 H, t, <sup>3</sup>J = 8.2 Hz, *p*-C<sub>6</sub>H<sub>5</sub>), 6.74 (1 H, t, <sup>3</sup>J = 7.6 Hz, *p*-NC<sub>5</sub>H<sub>5</sub>), 6.44 (2 H, app. t, <sup>3</sup>J = 7.6 Hz, *m*-NC<sub>5</sub>H<sub>5</sub>), 3.47 (2 H, m, CH<sub>2</sub>NSiMe<sub>3</sub> inner protons), 3.27 (2 H, m, CH<sub>2</sub>NSiMe<sub>3</sub> outer protons), 2.69 (2 H, m, CH<sub>2</sub>NMe inner protons), 2.50 (3 H, s, NMe), 2.32 (2 H, m, CH<sub>2</sub>NMe outer protons), 2.16 (3 H, s, NC(Me)) 1.81 (3 H, s, C(Me)NPh<sub>2</sub>), 0.07 (18 H, s, SiMe<sub>3</sub>). <sup>13</sup>C-<sup>1</sup>H NMR (C<sub>6</sub>D<sub>6</sub>, 75.4 MHz, 293 K): δ 153.2 (*o*-NC<sub>5</sub>H<sub>5</sub>), 152.4 (NCMe), 148.3 (*i*-NC<sub>6</sub>H<sub>5</sub>), 147.1 (*p*-NC<sub>5</sub>H<sub>5</sub>), 129.4 (*m*-NC<sub>6</sub>H<sub>5</sub>), 123.8 (*m*-NC<sub>5</sub>H<sub>5</sub>), 121.5 (*o*-NC<sub>6</sub>H<sub>5</sub>), 120.7 (*p*-NC<sub>6</sub>H<sub>5</sub>), 110.9 (C(NPh<sub>2</sub>)Me), 62.5 (CH<sub>2</sub>NMe), 48.2 (CH<sub>2</sub>NSiMe<sub>3</sub>), 48.0 (NMe), 24.1 (NCMe), 15.7 (C(NPh<sub>2</sub>)Me), 2.0 (SiMe<sub>3</sub>). IR (NaCl plates, Nujol mull, cm<sup>-1</sup>): ν 1679 (m), 1589 (s), 1491 (s), 1291 (m), 1247 (s), 926 (w), 837 (s), 750 (m), 699 (m). EI-MS: *m/z* 168 [NPh<sub>2</sub>]<sup>+</sup> (28%). Elemental analysis was not obtained for this complex, which degrades on handling.

**Data for Ti{MeN(CH<sub>2</sub>CH<sub>2</sub>NSiMe<sub>3</sub>)<sub>2</sub>}{NC(Ph)C(Me)NPh<sub>2</sub>}(py) (7).** <sup>1</sup>H NMR (C<sub>6</sub>D<sub>6</sub>, 299.9 MHz, 293 K): δ 8.08 (2 H, d, <sup>3</sup>J = 4.7 Hz, *o*-NC<sub>5</sub>H<sub>5</sub>), 7.69 (6 H, overlapping 2 × d, <sup>3</sup>J = 7.6 Hz and 6.4 Hz, *o*-NC<sub>6</sub>H<sub>5</sub> and *o*-CC<sub>6</sub>H<sub>5</sub>), 7.29 (6 H, overlapping 2 × app. t, <sup>3</sup>J = 7.6 Hz, 7.1 Hz and 6.4 Hz, *m*-NC<sub>6</sub>H<sub>5</sub> and *m*-CC<sub>6</sub>H<sub>5</sub>), 7.12 (1 H, t, <sup>3</sup>J = 7.1 Hz, *p*-CC<sub>6</sub>H<sub>5</sub>), 6.92 (2 H, t, <sup>3</sup>J = 7.1 Hz, *p*-NC<sub>6</sub>H<sub>5</sub>), 6.69 (1 H, t, <sup>3</sup>J = 7.6 Hz, *p*-NC<sub>5</sub>H<sub>5</sub>), 6.39 (2 H, app. t, <sup>3</sup>J = 4.7 Hz and 7.6 Hz, *m*-NC<sub>5</sub>H<sub>5</sub>), 3.34 (2 H, m, CH<sub>2</sub>NSiMe<sub>3</sub> inner protons), 3.22 (2 H, m, CH<sub>2</sub>NSiMe<sub>3</sub> outer protons), 2.64 (2 H, m, CH<sub>2</sub>NMe inner protons), 2.13 (2 H, m, CH<sub>2</sub>NMe outer protons), 2.08 (3 H, s, NMe), 1.69 (3 H, s, CH<sub>3</sub>), 0.07 (18 H, s, SiMe<sub>3</sub>). <sup>13</sup>C-<sup>1</sup>H NMR

(C<sub>6</sub>D<sub>6</sub>, 75.4 MHz, 293 K):  $\delta$  158.3 (CC<sub>6</sub>H<sub>5</sub>), 153.5 (*o*-NC<sub>5</sub>H<sub>5</sub>), 148.0 (*i*-NC<sub>6</sub>H<sub>5</sub>), 144.9 (*i*-CC<sub>6</sub>H<sub>5</sub>), 138.3 (*p*-NC<sub>5</sub>H<sub>5</sub>), 130.3 (*o*-CC<sub>6</sub>H<sub>5</sub>), 129.7 (*m*-NC<sub>6</sub>H<sub>5</sub>), 129.6 (*m*-CC<sub>6</sub>H<sub>5</sub>) 126.5 (*p*-CC<sub>6</sub>H<sub>5</sub>), 123.6 (*m*-NC<sub>5</sub>H<sub>5</sub>), 121.6 (*o*-NC<sub>6</sub>H<sub>5</sub>), 121.0 (*p*-NC<sub>6</sub>H<sub>5</sub>), 112.4 (CMe), 61.4 (CH<sub>2</sub>NMe), 48.6 (CH<sub>2</sub>NSiMe<sub>3</sub>), 47.0 (NMe), 16.2 (CMe), 2.1 (SiMe<sub>3</sub>). IR (NaCl plates, Nujol mull, cm<sup>-1</sup>):  $\nu$  1601 (m), 1585 (s), 1489 (s), 1459 (s), 1444 (s), 1324 (s), 1240 (s), 1205 (m), 1082 (m), 1066 (s), 1040 (m), 1013 (m), 993 (w), 943 (m), 923 (s), 832 (s), 803 (s), 748 (s), 703 (s), 694 (s), 637 (w), 601 (m). EI-MS:  $m/z$  168 [NPh<sub>2</sub>]<sup>+</sup> (26 %). Anal. Found (calcd. for C<sub>37</sub>H<sub>52</sub>N<sub>6</sub>Si<sub>2</sub>Ti): C, 64.8 (64.9); H, 7.6 (7.7); N, 12.2 (12.3) %.

**Data for PhC(NH<sub>2</sub>)C(Me)NPh<sub>2</sub> (8).** <sup>1</sup>H NMR (C<sub>6</sub>D<sub>6</sub>, 299.9 MHz, 293 K):  $\delta$  7.31 (2 H, dd, <sup>3</sup>*J* = 7.7 <sup>4</sup>*J* = 1.7 Hz, *o*-CC<sub>6</sub>H<sub>5</sub>), 7.23 (4 H, d, <sup>3</sup>*J* = 7.6 Hz, *o*-NC<sub>6</sub>H<sub>5</sub>), 7.16-7.05 (7 H, overlapping peaks, *m*-NC<sub>6</sub>H<sub>5</sub>, *m*-CC<sub>6</sub>H<sub>5</sub>, *p*-CC<sub>6</sub>H<sub>5</sub>), 6.83 (2 H, tt, <sup>3</sup>*J* = 7.1 Hz, <sup>4</sup>*J* = 1.2, *p*-NC<sub>6</sub>H<sub>5</sub>), 2.99 (2 H, s, NH<sub>2</sub>), 1.73 (3H, s, CH<sub>3</sub>). <sup>13</sup>C-<sup>1</sup>H NMR (C<sub>6</sub>D<sub>6</sub>, 75.4 MHz, 293 K):  $\delta$  146.4 (*i*-NC<sub>6</sub>H<sub>5</sub>), 140.0 (*i*-CC<sub>6</sub>H<sub>5</sub>), 139.2 (CC<sub>6</sub>H<sub>5</sub>), 130.0 *m*-NC<sub>6</sub>H<sub>5</sub>), 129.4 (*o*-CC<sub>6</sub>H<sub>5</sub>), 128.7 (*m*-CC<sub>6</sub>H<sub>5</sub>), 128.2 (*p*-CC<sub>6</sub>H<sub>5</sub>), 122.0 (*p*-NC<sub>6</sub>H<sub>5</sub>), 121.0 (*o*-NC<sub>6</sub>H<sub>5</sub>), 111.9 (CCH<sub>3</sub>), 16.3 (CCH<sub>3</sub>). IR (NaCl plates, Nujol mull, cm<sup>-1</sup>):  $\nu$  3365 (s, br), 2331 (w, br), 1935 (w), 1653 (m), 1588 (s), 1491 (s), 1307 (m), 1300 (m), 1284 (m), 1150 (s, br), 983 (m), 749 (s), 693 (s). EI-MS:  $m/z$  300 [M<sup>+</sup>] (100%).

**Data for Cp\*Ti{MeC(N<sup>i</sup>Pr)<sub>2</sub>}(NNPh<sub>2</sub>) (9).** <sup>1</sup>H NMR (C<sub>6</sub>D<sub>6</sub>, 299.9 MHz, 293 K):  $\delta$  7.22 (4 H, d, <sup>3</sup>*J* = 8.8 Hz, *o*-C<sub>6</sub>H<sub>5</sub>), 7.13 (4 H, dd, <sup>3</sup>*J* = 7.5 and 8.8 Hz, *m*-C<sub>6</sub>H<sub>5</sub>), 6.81 (2 H, t, <sup>3</sup>*J* = 7.5 Hz, *p*-C<sub>6</sub>H<sub>5</sub>), 3.60 (2 H, sept., <sup>3</sup>*J* = 6.3 Hz, NCHMeMe), 1.99 (15 H, s, C<sub>5</sub>Me<sub>5</sub>), 1.65 (3 H, s, MeCN<sub>2</sub>), 1.04 (6 H, d, <sup>3</sup>*J* = 6.3 Hz, NCHMeMe), 1.03 (6 H, d, <sup>3</sup>*J* = 6.3 Hz, NCHMeMe). <sup>13</sup>C-<sup>1</sup>H NMR (C<sub>6</sub>D<sub>6</sub>, 75.4 MHz, 293 K):  $\delta$  160.7 (CN<sub>2</sub>), 147.1 (*i*-C<sub>6</sub>H<sub>5</sub>), 129.1 (*m*-C<sub>6</sub>H<sub>5</sub>), 122.0 (*p*-C<sub>6</sub>H<sub>5</sub>), 120.6 (*o*-C<sub>6</sub>H<sub>5</sub>), 120.0 (C<sub>5</sub>Me<sub>5</sub>), 49.5 (NCHMeMe), 26.8 (NCHMeMe), 25.8 (NCHMeMe), 12.7 (C<sub>5</sub>Me<sub>5</sub>), 12.3 (MeCN<sub>2</sub>). IR (NaCl plates, Nujol mull, cm<sup>-1</sup>):  $\nu$  2609 (w), 1656 (w), 1595 (s), 1586(s), 1488 (s), 1466 (s), 1378 (s), 1339 (m), 1333 (m), 1319 (m), 1311 (m), 1295 (w), 1277 (w), 1254 (m), 1215 (m), 1169 (m), 1160 (w), 1148 (w), 1119 (w), 1071 (w), 1026 (w), 992 (w), 919 (w), 875 (w), 838 (w), 812 (m), 791 (w), 751 (s), 741 (s), 723 (w), 700 (s), 693 (s), 631 (m). EI-MS:  $m/z$  506 [M<sup>+</sup>] (70 %), 168 [NPh<sub>2</sub>]<sup>+</sup> (100 %), 77 [Ph<sup>+</sup>] (68 %). Anal. found (calcd. for C<sub>30</sub>H<sub>42</sub>N<sub>4</sub>Ti): C, 71.0 (71.1); H, 8.3 (8.4); N, 11.0 (11.1) %.

**Data for Cp\*Ti{MeC(N<sup>i</sup>Pr)<sub>2</sub>}(NNMe<sub>2</sub>) (10).**

<sup>1</sup>H NMR (C<sub>6</sub>D<sub>6</sub>, 299.9 MHz, 293 K):  $\delta$  7.22 (4 H, d, <sup>3</sup>*J* = 8.8 Hz, *o*-C<sub>6</sub>H<sub>5</sub>), 7.13 (4 H, dd, <sup>3</sup>*J* = 7.5 and 8.8 Hz, *m*-C<sub>6</sub>H<sub>5</sub>), 6.81 (2 H, t, <sup>3</sup>*J* = 7.5 Hz, *p*-C<sub>6</sub>H<sub>5</sub>), 3.60 (2 H, sept., <sup>3</sup>*J* = 6.3 Hz, NCHMeMe), 1.99 (15 H, s, C<sub>5</sub>Me<sub>5</sub>), 1.65 (3 H, s, MeCN<sub>2</sub>), 1.04 (6 H, d, <sup>3</sup>*J* = 6.3 Hz, NCHMeMe), 1.03 (6 H, d, <sup>3</sup>*J* = 6.3 Hz, NCHMeMe). <sup>13</sup>C-<sup>1</sup>H NMR (C<sub>6</sub>D<sub>6</sub>, 75.4 MHz, 293 K):  $\delta$  160.6 (CN<sub>2</sub>), 118.9 (C<sub>5</sub>Me<sub>5</sub>), 49.1

(NCHMeMe), 48.3 (NMe), 26.8 (NCHMeMe), 26.1 (NCHMeMe), 12.6 (C<sub>5</sub>Me<sub>5</sub>), 11.9 (MeCN<sub>2</sub>). Anal. found (calcd. for C<sub>21</sub>H<sub>41</sub>N<sub>4</sub>Ti): C, 63.0 (62.8); H, 9.8 (10.0); N, 14.5 (14.7) %.

**Data for Cp\*Ti(NNPh<sub>2</sub>)Cl(py) (11).** <sup>1</sup>H NMR (C<sub>6</sub>D<sub>6</sub>, 299.9 MHz, 293 K): δ 8.36 (2 H, d, <sup>3</sup>J = 5.3 Hz, *o*-NC<sub>5</sub>H<sub>5</sub>), 7.49 (4 H, d, <sup>3</sup>J = 8.8 Hz, *o*-C<sub>6</sub>H<sub>5</sub>), 7.21 (4 H, app. t, <sup>3</sup>J = 7.1 and 8.8 Hz, *m*-C<sub>6</sub>H<sub>5</sub>), 6.87 (2 H, t, <sup>3</sup>J = 7.4 Hz, *p*-C<sub>6</sub>H<sub>5</sub>), 6.75 (1 H, t, <sup>3</sup>J = 7.6 Hz, *p*-NC<sub>5</sub>H<sub>5</sub>), 6.44 (2 H, app. t, <sup>3</sup>J = 6.5 and 7.1 Hz, *m*-NC<sub>5</sub>H<sub>5</sub>), 1.88 (15 H, s, C<sub>5</sub>Me<sub>5</sub>). <sup>13</sup>C-<sup>1</sup>H NMR (C<sub>6</sub>D<sub>6</sub>, 75.4 MHz, 293 K): δ 150.8 (*o*-NC<sub>5</sub>H<sub>5</sub>), 146.7 (*i*-C<sub>6</sub>H<sub>5</sub>), 138.4 (*p*-NC<sub>5</sub>H<sub>5</sub>), 129.5 (*m*-C<sub>6</sub>H<sub>5</sub>), 124.6 (*m*-NC<sub>5</sub>H<sub>5</sub>), 122.9 (*p*-C<sub>6</sub>H<sub>5</sub>), 120.4 (*o*-NC<sub>5</sub>H<sub>5</sub>), 118.5 (C<sub>5</sub>Me<sub>5</sub>), 12.0 (C<sub>5</sub>Me<sub>5</sub>). IR (NaCl plates, Nujol mull, cm<sup>-1</sup>): ν 1603 (m), 1593 (s) 1584 (s) 1486 (s) 1444 (s) 1310 (s) 1281 (m) 1239 (s) 1214 (w) 1169 (m) 1152 (m) 1069 (m) 1014 (m) 989 (m) 875 (w) 746 (s) 692 (s) 640 (w) 518 (s). EI-MS: *m/z* 183 [NNPh<sub>2</sub>]<sup>+</sup> (100), 168 [NPh<sub>2</sub>]<sup>+</sup> (95 %), 77 [C<sub>6</sub>H<sub>5</sub>]<sup>+</sup> (85 %). Anal. found (calcd. for C<sub>27</sub>H<sub>31</sub>ClN<sub>3</sub>Ti): C, 67.5 (67.4); H, 6.3 (6.5); N, 8.7 (8.7) %.

**Data for Cp<sub>2</sub>Ti(NNPh<sub>2</sub>)(py) (12).** <sup>1</sup>H NMR data (C<sub>6</sub>D<sub>6</sub>, 299.9 MHz, 293 K): 8.39 (2H, d, <sup>3</sup>J = 6.5 Hz, *o*-NC<sub>5</sub>H<sub>5</sub>), 7.25 (4H, d, <sup>3</sup>J = 8.8 Hz, *o*-C<sub>6</sub>H<sub>5</sub>), 7.15 (8H, app. t, <sup>3</sup>J = 7.7 and 8.8 Hz, *m*-C<sub>6</sub>H<sub>5</sub>), 6.88 (2H, t, <sup>3</sup>J = 7.7, *p*-C<sub>6</sub>H<sub>5</sub>), 6.66 (1H, t, <sup>3</sup>J = 7.6 Hz, *p*-NC<sub>5</sub>H<sub>5</sub>), 6.23 (2H, app. t, <sup>3</sup>J = 6.5 and 7.6 Hz, *m*-NC<sub>5</sub>H<sub>5</sub>), 5.88 (10H, s, C<sub>5</sub>H<sub>5</sub>). <sup>13</sup>C-<sup>1</sup>H NMR data (C<sub>6</sub>D<sub>6</sub>, 75.4 MHz, 293 K): 155.0 (*o*-NC<sub>5</sub>H<sub>5</sub>), 146.5 (*i*-C<sub>6</sub>H<sub>5</sub>), 137.0 (*p*-NC<sub>5</sub>H<sub>5</sub>), 129.9 (*m*-C<sub>6</sub>H<sub>5</sub>), 123.8 (*m*-NC<sub>5</sub>H<sub>5</sub>), 123.3 (*p*-C<sub>6</sub>H<sub>5</sub>), 120.8 (*o*-C<sub>6</sub>H<sub>5</sub>), 110.0 (C<sub>5</sub>H<sub>5</sub>). IR (NaCl plates, Nujol mull, cm<sup>-1</sup>): ν 1597 (m), 1592 (m), 1584 (m), 1575 (w), 1486 (m), 1440 (s), 1291 (w), 1214 (w), 1151 (w), 1096 (s), 1069 (s), 812 (s), 795 (s), 783 (s), 760 (w), 702 (w), 694 (s), 628 (m). EI-MS: *m/z* 168 [NPh<sub>2</sub>]<sup>+</sup> (52 %), 77 [C<sub>6</sub>H<sub>5</sub>]<sup>+</sup> (10 %), 65 [C<sub>5</sub>H<sub>5</sub>]<sup>+</sup> (70 %). Anal. Found (Calc.) for C<sub>27</sub>H<sub>25</sub>N<sub>3</sub>Ti: C, 73.8 (73.8); H, 5.6 (5.7); N, 9.5 (9.6).

**Data for Cp\*Ti(NNPh<sub>2</sub>)(NHPh<sub>2</sub>)(py) (13).** <sup>1</sup>H NMR (C<sub>6</sub>D<sub>6</sub>, 299.9 MHz, 293 K): δ 7.85 (2 H, d, <sup>3</sup>J = 6.5 Hz, *o*-NC<sub>5</sub>H<sub>5</sub>), 7.34 (4 H, d, <sup>3</sup>J = 8.8 Hz, *o*-NNC<sub>6</sub>H<sub>5</sub>), 7.23 (4 H, d, <sup>3</sup>J = 8.8 Hz, *o*-NHNC<sub>6</sub>H<sub>5</sub>), 7.08 (4 H, app. t, <sup>3</sup>J = 7.1 and 8.8 Hz, *m*-NNC<sub>6</sub>H<sub>5</sub>), 7.02 (4 H, app. t, <sup>3</sup>J = 7.1 and 8.8 Hz, *m*-NHNC<sub>6</sub>H<sub>5</sub>), 6.96 (1 H, s, NHPh<sub>2</sub>), 6.84 (2 H, t, <sup>3</sup>J = 7.1 Hz, *p*-NNC<sub>6</sub>H<sub>5</sub>), 6.74 (2 H, t, <sup>3</sup>J = 7.5 Hz, *p*-NHNC<sub>6</sub>H<sub>5</sub>), 6.66 (1 H, t, <sup>3</sup>J = 7.7 Hz, *p*-NC<sub>5</sub>H<sub>5</sub>), 6.24 (2 H, dd, <sup>3</sup>J = 7.7 and 6.5 Hz, *m*-NC<sub>5</sub>H<sub>5</sub>), 1.88 (15 H, s, C<sub>5</sub>Me<sub>5</sub>). <sup>13</sup>C-<sup>1</sup>H NMR (C<sub>6</sub>D<sub>6</sub>, 75.4 MHz, 293 K): δ 152.1 (*o*-NC<sub>5</sub>H<sub>5</sub>), 150.9 (*i*-NHNC<sub>6</sub>H<sub>5</sub>), 147.1 (*i*-NNC<sub>6</sub>H<sub>5</sub>), 137.4 (*p*-NC<sub>5</sub>H<sub>5</sub>), 129.2 (*m*-NNC<sub>6</sub>H<sub>5</sub>), 128.9 *m*-NHNC<sub>6</sub>H<sub>5</sub>, 123.6 (*m*-NC<sub>5</sub>H<sub>5</sub>), 122.0 (*p*-NNC<sub>6</sub>H<sub>5</sub>), 121.0 (*p*-NHNC<sub>6</sub>H<sub>5</sub>), 120.3 (*o*-NC<sub>5</sub>H<sub>5</sub>), 116.2 (C<sub>5</sub>Me<sub>5</sub>), 11.9 (C<sub>5</sub>Me<sub>5</sub>). IR (NaCl plates, Nujol mull, cm<sup>-1</sup>): ν 2361 (s), 2338 (s), 1942 (w), 1869 (w), 1844 (w), 1829 (w), 1792 (w), 1772 (w), 1750 (w), 1734 (m), 1717 (m), 1700 (m), 1684 (m), 1670 (w), 1663 (s), 1653 (m), 1647 (m), 1636 (w), 1616 (s), 1594 (s), 1586 (s), 1559 (s), 1541 (s), 1507 (s), 1490 (s), 1444 (s), 1419 (m), 1395 (w), 1376 (s), 1328 (s), 1312 (s), 1277 (m), 1252 (m), 1213 (w), 1167 (m), 1158 (m), 1069 (m), 1044 (m), 1025 (m), 988 (m), 927

(w), 838 (s), 791 (s), 744 (s), 697 (m), 640 (w). EI-MS:  $m/z$  100 (88 %)  $[\text{NPh}_2]^+$ , 77  $[\text{Ph}]^+$  (58 %). Anal. found (calcd. for  $\text{C}_{39}\text{H}_{41}\text{N}_5\text{Ti}$ ): C 74.5 (74.6), H 6.8 (6.6), N 11.1 (11.2) %

**Computational details.** All the calculations have been performed with the Gaussian03 package<sup>1</sup> at the B3PW91 level.<sup>2,3</sup> The titanium atom was represented by the relativistic effective core potential (RECP) from the Stuttgart group (12 valence electrons) and its associated basis set,<sup>4</sup> augmented by an f polarization function ( $\alpha = 0.869$ ).<sup>5</sup> The remaining atoms (C, H, N) were represented by a 6-31G(d,p) basis set.<sup>6</sup> Full optimizations of geometry without any constraint were performed, followed by analytical computation of the Hessian matrix to confirm the nature of the located extrema as minima on the potential energy surface.

- (1) M. J. Frisch, G. W. Trucks, H. B. Schlegel, G. E. Scuseria, M. A. Robb, J. R. Cheeseman, J. Montgomery, J. A., T. Vreven, K. N. Kudin, J. C. Burant, J. M. Millam, S. S. Iyengar, J. Tomasi, V. Barone, B. Mennucci, M. Cossi, G. Scalmani, N. Rega, G. A. Petersson, H. Nakatsuji, M. Hada, M. Ehara, K. Toyota, R. Fukuda, J. Hasegawa, M. Ishida, T. Nakajima, Y. Honda, O. Kitao, H. Nakai, M. Klene, X. Li, J. E. Knox, H. P. Hratchian, J. B. Cross, V. Bakken, C. Adamo, J. Jaramillo, R. Gomperts, R. E. Stratmann, O. Yazyev, A. J. Austin, R. Cammi, C. Pomelli, J. W. Ochterski, P. Y. Ayala, K. Morokuma, G. A. Voth, P. Salvador, J. J. Dannenberg, V. G. Zakrzewski, S. Dapprich, A. D. Daniels, M. C. Strain, O. Farkas, D. K. Malick, A. D. Rabuck, K. Raghavachari, J. B. Foresman, J. V. Ortiz, Q. Cui, A. G. Baboul, S. Clifford, J. Cioslowski, B. B. Stefanov, G. Liu, A. Liashenko, P. Piskorz, I. Komaromi, R. L. Martin, D. J. Fox, T. Keith, M. A. Al-Laham, C. Y. Peng, A. Nanayakkara, M. Challacombe, P. M. W. Gill, B. Johnson, W. Chen, M. W. Wong, C. Gonzalez and J. A. Pople, in 'Gaussian 03, Revision C.02', Wallingford CT, 2004.
- (2) A. D. Becke, *J. Chem. Phys.*, 1993, **98**, 5648.
- (3) J. P. Perdew and Y. Wang, *Phys. Rev. B*, 1992, **45**, 13244.
- (4) D. Andrae, U. Haussermann, M. Dolg, H. Stoll and H. Preuss, *Theor. Chim. Acta*, 1990, **77**, 123.
- (5) A. W. Ehlers, M. Bohme, S. Dapprich, A. Gobbi, A. Hollwarth, V. Jonas, K. F. Kohler, R. Stegmann, A. Veldkamp and G. Frenking, *Chem. Phys. Lett.*, 1993, **208**, 111.
- (6) P. C. Hariharan and J. A. Pople, *Theor. Chim. Acta*, 1973, **28**, 213.
